# Supplementary material for: Association of ADP-Induced Whole-Blood Platelet Aggregation with Serum Low-Density Lipoprotein Cholesterol in Patients with Coronary Artery Disease When Receiving Maintenance Ticagrelor-Based Dual Antiplatelet Therapy
Source: MDPI journal article supplement (doi:10.3390/jcm12134530), 2023-07-06
Supplement: s1 [file s1]

**Supplementary Table S2.** Prevalence of T2DM and the level of HbA1c stratified by platelet reactivity in the overall study patients receiving DAPT.

|                        | ADP-induced platelet aggregability, AU * min |                        | <i>p</i> |
|------------------------|----------------------------------------------|------------------------|----------|
|                        | < 190<br><i>n</i> = 62                       | ≥ 190<br><i>n</i> = 64 |          |
| T2DM, <i>n</i> (%)     | 28 (45)                                      | 33 (52)                | n.s.     |
| HbA1c <sup>a</sup> , % | 7.3 ± 0.8                                    | 7.3 ± 0.9              | n.s.     |

Values are shown as mean ± S.D. or *n* (%). Abbreviations as in Table 1.

<sup>a</sup> only for diabetic subjects
