# Supplementary material for: Association of ADP-Induced Whole-Blood Platelet Aggregation with Serum Low-Density Lipoprotein Cholesterol in Patients with Coronary Artery Disease When Receiving Maintenance Ticagrelor-Based Dual Antiplatelet Therapy
Source: MDPI journal article supplement (doi:10.3390/jcm12134530), 2023-07-06
Supplement: s1 [file s1]

**Supplementary Table S1.** Platelet reactivity, plasma sP-selectin, clinical characteristics and medication in patients receiving clopidogrel-based DAPT stratified by LDL-c levels.

| Variable                                                   | LDL-c                         |                              | <i>p</i> |
|------------------------------------------------------------|-------------------------------|------------------------------|----------|
|                                                            | Below-median<br><i>n</i> = 32 | Over-median<br><i>n</i> = 32 |          |
| Platelet reactivity, AU * min                              | 246 ± 101                     | 268 ± 108                    | n.s.     |
| sP-selectin, µg/L                                          | 120 ± 37                      | 118 ± 35                     | n.s.     |
| Clinical and biochemical characteristics                   |                               |                              |          |
| Age, years                                                 | 65 ± 10                       | 65 ± 9                       | n.s.     |
| Men/Women, <i>n</i> (%)                                    | 25/6 (78/22)                  | 21/10 (66/34)                | n.s.     |
| T2DM, <i>n</i> (%)                                         | 17 (53)                       | 14 (44)                      | n.s.     |
| HbA1c <sup>a</sup> , %                                     | 7.3 ± 0.8                     | 7.4 ± 0.9                    | n.s.     |
| BMI, kg/m <sup>2</sup>                                     | 28.8 ± 3.7                    | 29.1 ± 3.8                   | n.s.     |
| HDL-c, mmol/L                                              | 1.0 ± 0.3                     | 1.0 ± 0.3                    | n.s.     |
| TG, mmol/L                                                 | 1.8 ± 0.8                     | 1.6 ± 0.7                    | n.s.     |
| Arterial hypertension, <i>n</i> (%)                        | 27 (84)                       | 29 (91)                      | n.s.     |
| Current smoking, <i>n</i> (%)                              | 10 (31)                       | 8 (25)                       | n.s.     |
| LVEF, %                                                    | 49 ± 9                        | 51 ± 10                      | n.s.     |
| Multivessel coronary artery disease, <i>n</i> (%)          | 20 (63)                       | 25 (78)                      | n.s.     |
| eGFR, mL/min per 1.73 m <sup>2</sup>                       | 77 ± 18                       | 76 ± 16                      | n.s.     |
| CRP, mg/L                                                  | 2.3 [1.2–3.7]                 | 2.5 [1.4–4.0]                | n.s.     |
| Hb, g/dL                                                   | 13.4 ± 2.0                    | 13.3 ± 1.7                   | n.s.     |
| Platelet count, 10 <sup>3</sup> /µL                        | 221 ± 73                      | 236 ± 79                     | n.s.     |
| Drugs beyond DAPT, ACEI/ARB, high-intensity statin and PPI |                               |                              |          |
| β-blockers, <i>n</i> (%)                                   | 28 (88)                       | 30 (94)                      | n.s.     |
| Diuretics, <i>n</i> (%)                                    | 11 (34)                       | 9 (28)                       | n.s.     |
| Calcium channel blockers, <i>n</i> (%)                     | 11 (34)                       | 12 (38)                      | n.s.     |
| Metformin, <i>n</i> (%) of diabetic subjects)              | 15 (88)                       | 13 (93)                      | n.s.     |
| Sulfonylureas, <i>n</i> (%) of diabetic subjects)          | 5 (29)                        | 2 (14)                       | n.s.     |
| Insulin, <i>n</i> (%) of diabetic subjects)                | 6 (35)                        | 4 (29)                       | n.s.     |

Values are shown as mean ± S.D., median [interquartile range] or *n* (%). Abbreviations as in Table 1.

<sup>a</sup> only for diabetic subjects
